# Supplementary material
Source: PubMed Central journal article supplement (PMC404118)

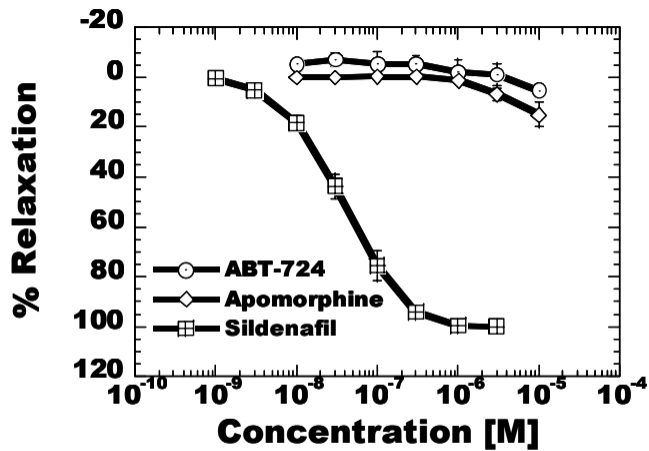

Supplement: pnas_101_17_6758__2.pdf [file pnas_101_17_6758__2.pdf]

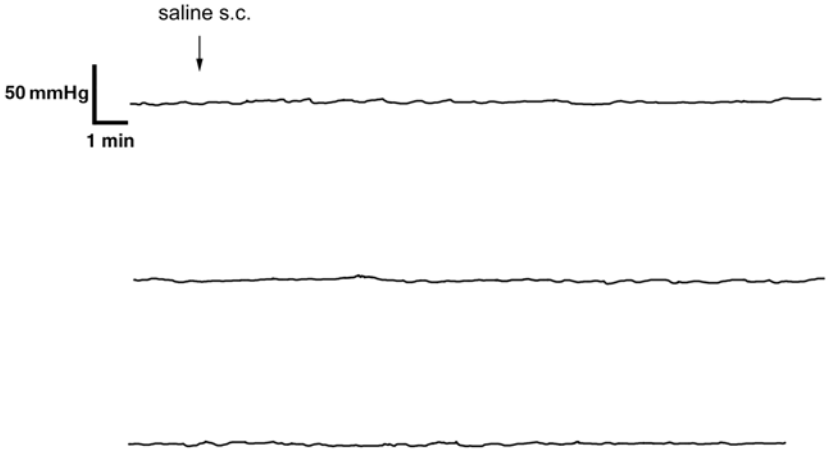

Supplement: pnas_101_17_6758__3.pdf [file pnas_101_17_6758__3.pdf]
